# Supplementary material
Source: PubMed Central journal article supplement (PMC4767665)

TRIM21

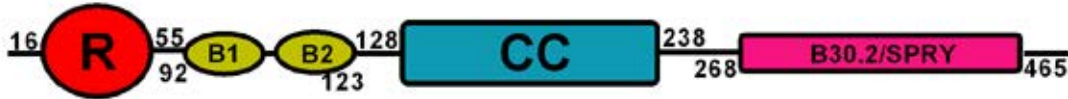

TRIM38

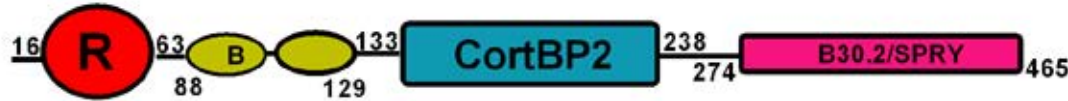

Supplement: NIHMS743042-supplement-Supplemental_Figure_1.pdf [file NIHMS743042-supplement-Supplemental_Figure_1.pdf]
